# Supplementary material
Source: Springer Nature journal article supplement (https://www.springermedizin.de/resource/supplementary/12889_2009_2097_MOESM5_ESM.pdf/9484574)

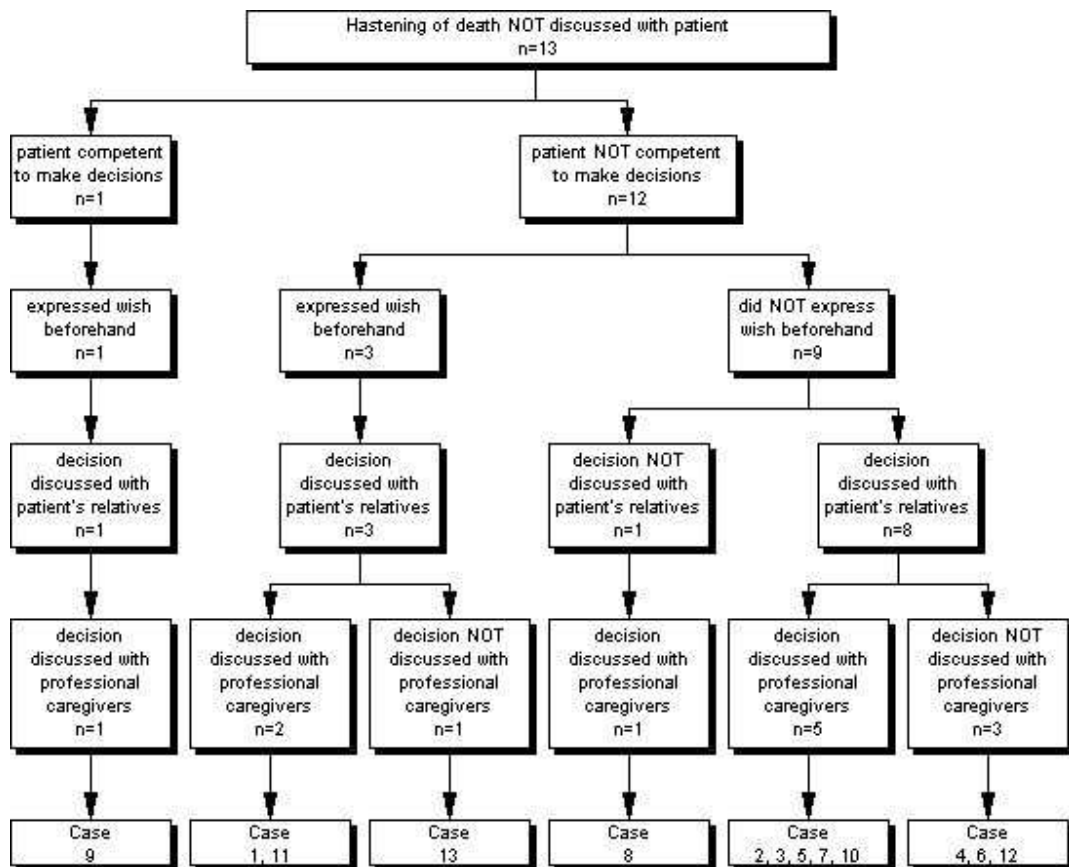

Supplement: MOESM5 [file 9484574]
